# Supplementary material for: Zn-doped SnS with sulfur vacancies for enhanced photocatalytic hydrogen evolution from water
Source: Royal Society of Chemistry journal article supplement (doi:10.1039/d2nj03520k), 2022-01-01
Supplement: d2nj03520k1.pdf [file d2nj03520k1.pdf]

## Supplementary Materials

### **Zn-doped SnS with sulfur vacancies for photocatalytic hydrogen evolution from water**

Weisheng Lei<sup>a</sup>, Fengzhi Wang<sup>a,b,\*</sup>, Bin Lu<sup>a,b</sup>, Zhizhen Ye<sup>a,b</sup> and Xinhua Pan<sup>a,b,\*</sup>

<sup>a</sup> *State Key Laboratory of Silicon Materials, School of Materials Science and Engineering, Zhejiang University, Hangzhou 310027, P.R. China*

<sup>b</sup> *Wenzhou Key Laboratory of Novel Optoelectronic and Nano Materials, Institute of Wenzhou, Zhejiang University, Wenzhou 325006, P.R. China*

\* Corresponding authors. Tel.: + 86 571 87952187; fax: + 86 571 87952124.

E-mail addresses: wang\_fz@zju.edu.cn, panxinhua@zju.edu.cn

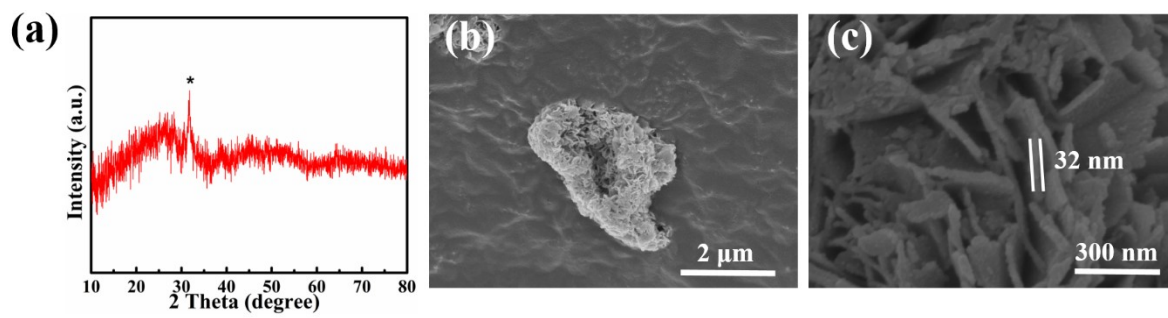

**Fig. S1.** (a) XRD patterns of SnS-0.6 sample; (c-d) SEM images of SnS-0.6 sample.

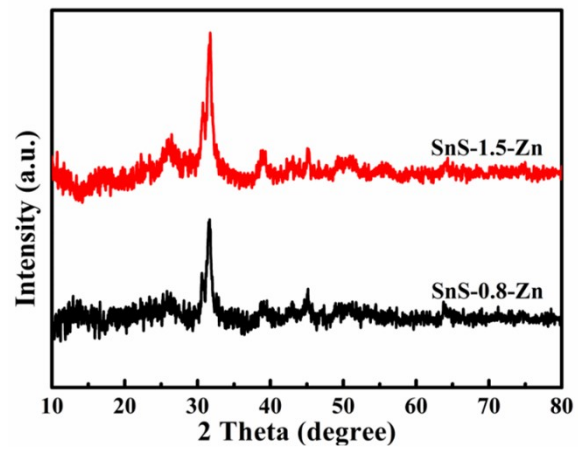

Fig. S2. XRD patterns of SnS-0.8-Zn, and SnS-1.5-Zn samples

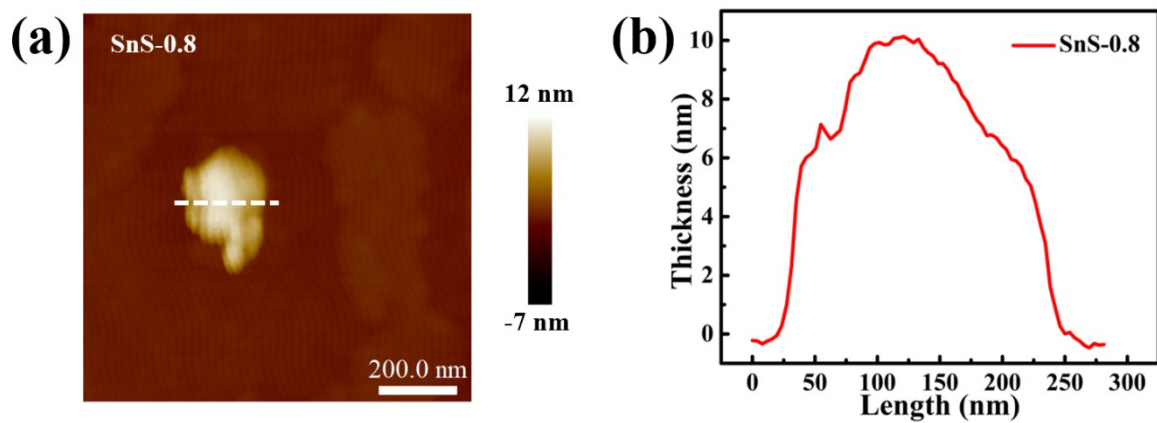

**Fig. S3.** (a) AFM image and (b) typical thickness curves of the nanosheets.

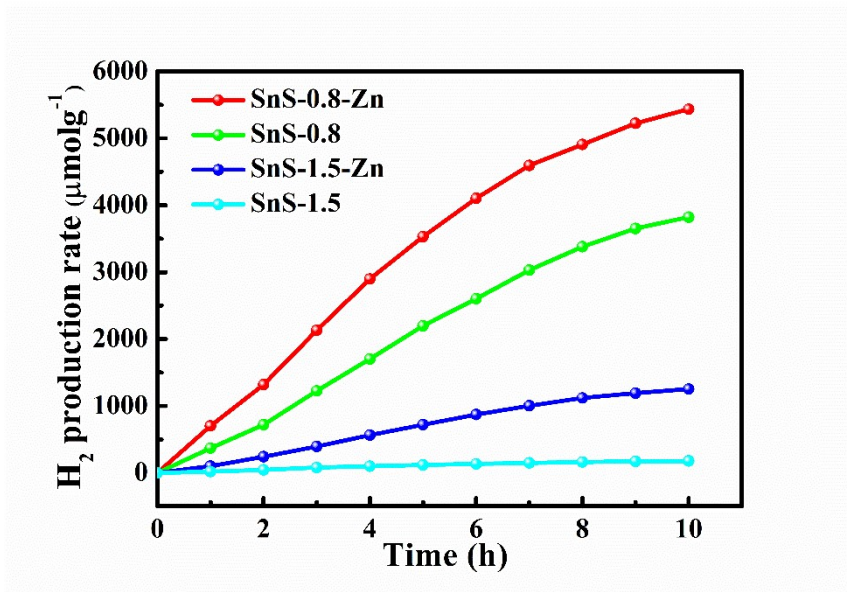

Fig. S4. Photocatalytic H<sub>2</sub> evolution process of SnS-0.8-Zn, SnS-0.8, SnS-1.5-Zn and SnS-1.5 samples with Pt loaded for 10 h.

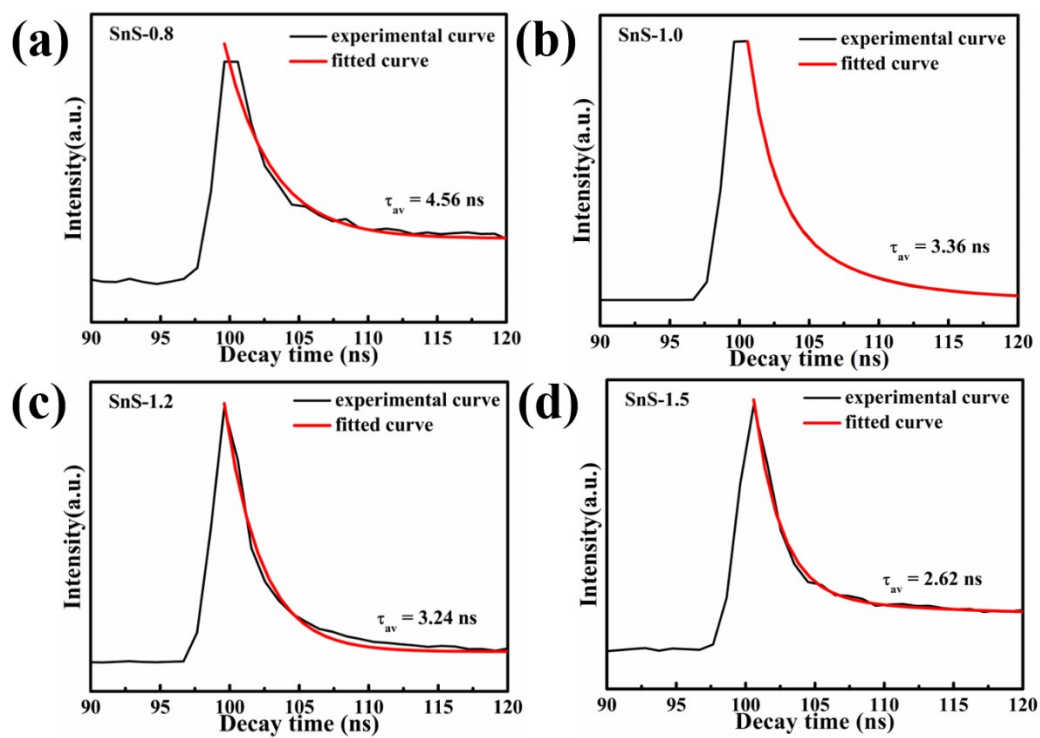

Fig. S5. TRPL decay spectra of (a) SnS-0.8, (b) SnS-1.0, (c) SnS-1.2 and (d) SnS-1.5 samples.

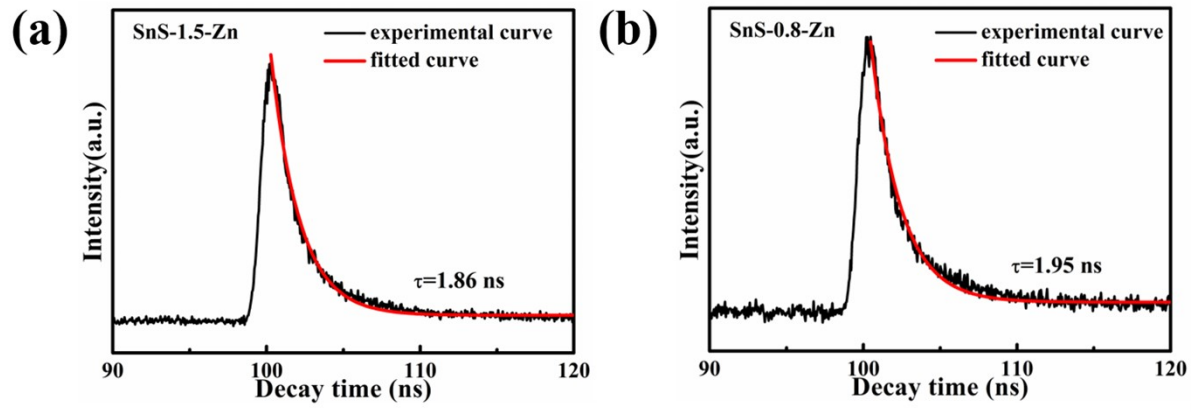

Fig. S6. TRPL decay spectra of (a) SnS-0.8-Zn and (d) SnS-1.5-Zn samples.

**Table S1.** Kinetic parameters of PL decay for SnS-0.8, SnS-1.0, SnS-1.2, SnS-1.5, SnS-0.8-Zn and SnS-1.5-Zn

| <b>Samples</b>    | <b>A<sub>1</sub></b> | <b><math>\tau_1</math> (ns)</b> | <b>A<sub>2</sub></b> | <b><math>\tau_2</math> (ns)</b> | <b><math>\tau_{av}</math></b> |
|-------------------|----------------------|---------------------------------|----------------------|---------------------------------|-------------------------------|
| <b>SnS-0.8</b>    | <b>0.41</b>          | <b>5.84</b>                     | <b>0.63</b>          | <b>1.71</b>                     | <b>4.56</b>                   |
| <b>SnS-1.0</b>    | <b>0.42</b>          | <b>3.36</b>                     | <b>0.42</b>          | <b>3.36</b>                     | <b>3.36</b>                   |
| <b>SnS-1.2</b>    | <b>0.71</b>          | <b>1.94</b>                     | <b>0.08</b>          | <b>15.5</b>                     | <b>3.24</b>                   |
| <b>SnS-1.5</b>    | <b>0.48</b>          | <b>2.62</b>                     | <b>0.48</b>          | <b>2.62</b>                     | <b>2.62</b>                   |
| <b>SnS-0.8-Zn</b> | <b>0.81</b>          | <b>1.53</b>                     | <b>0.12</b>          | <b>6.74</b>                     | <b>3.67</b>                   |
| <b>SnS-1.5-Zn</b> | <b>0.70</b>          | <b>1.31</b>                     | <b>0.23</b>          | <b>5.26</b>                     | <b>3.55</b>                   |
